# Supplementary material
Source: Springer Nature journal article supplement (https://www.springermedizin.de/resource/supplementary/12879_2011_2150_MOESM5_ESM.pdf/9443788)

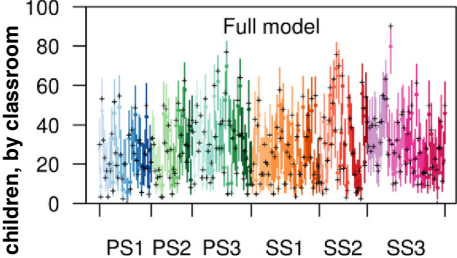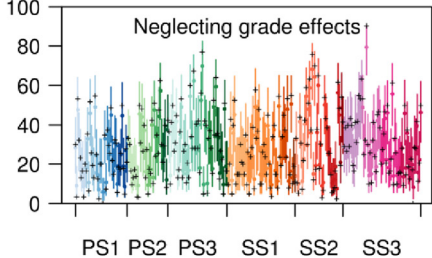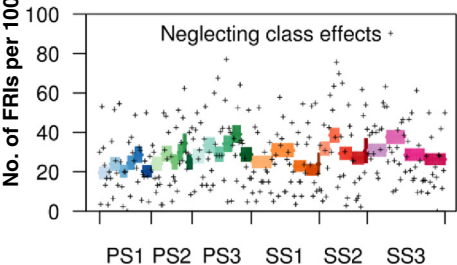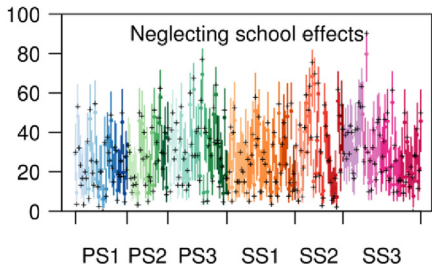

**Classroom, sorted by school and grade**

Supplement: MOESM5 [file 9443788]
